# Supplementary material
Source: ML conference proceedings conference paper supplement (https://openreview.net/forum?id=HzgpxFETf5)
Supplement: supplementary_material [file attachment]

How did you feel about creating steps for your tutorial by saving it?

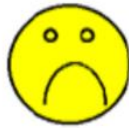

Awful

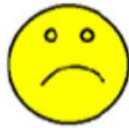

Not very good

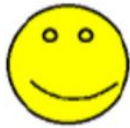

Good

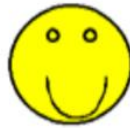

Really good

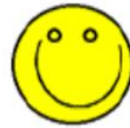

Brilliant

How did you feel about writing comments?

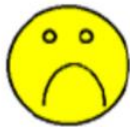

Awful

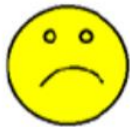

Not very good

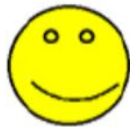

Good

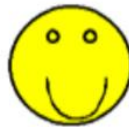

Really good

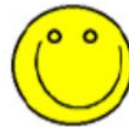

Brilliant

How did you feel about viewing other's tutorial?

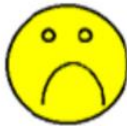

Awful

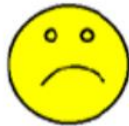

Not very good

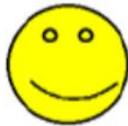

Good

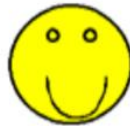

Really good

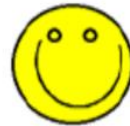

Brilliant

How did you feel about using other's tutorials?

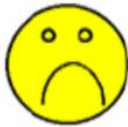

Awful

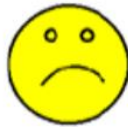

Not very good

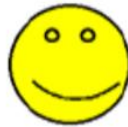

Good

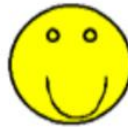

Really good

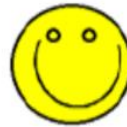

Brilliant

Which feature was most fun among the following?

Drawing

Creating steps

Adding Comments

Editing your tutorial

Fun

|  |  |  |  |
|--|--|--|--|
|  |  |  |  |
|--|--|--|--|

Most

Worst

Which task did you find most fun among the following four?

| <p><b>Drawing</b></p> <br> | <p><b>Creating Tutorial</b></p> <br> | <p><b>Viewing Others Tutorials</b></p> <br> | <p><b>Using Other's Tutorial</b></p> <br> |
|----------------------------------------------------------------------------------------------------------------------------------------------------------------------------------------------|--------------------------------------------------------------------------------------------------------------------------------------------------------------------------------------------------------|-------------------------------------------------------------------------------------------------------------------------------------------------------------------------------------------------------------------|-----------------------------------------------------------------------------------------------------------------------------------------------------------------------------------------------------------------|
| Fun                                                                                                                                                                                          |                                                                                                                                                                                                        |                                                                                                                                                                                                                   |                                                                                                                                                                                                                 |
|                                                                                                                                                                                              | Most                                                                                                                                                                                                   |                                                                                                                                                                                                                   | Worst                                                                                                                                                                                                           |

Would you like to do it again?

|                                                                                                                                                                                     | Yes | Maybe | No |
|-------------------------------------------------------------------------------------------------------------------------------------------------------------------------------------|-----|-------|----|
| <p>Drawing</p>   |     |       |    |

Would you like to do it again?

|                                                                                                                                                                                               | Yes | Maybe | No |
|-----------------------------------------------------------------------------------------------------------------------------------------------------------------------------------------------|-----|-------|----|
| <p>Creating Tutorial</p>   |     |       |    |

Would you like to do it again?

|                                                                                                                                                                                                         | Yes | Maybe | No |
|---------------------------------------------------------------------------------------------------------------------------------------------------------------------------------------------------------|-----|-------|----|
| <p>Viewing Other's Tutorial</p> <br> |     |       |    |

Would you like to do it again?

|                                                                                                                                                                                                                                                                                                                                                                                                                                                                                         | Yes | Maybe | No |
|-----------------------------------------------------------------------------------------------------------------------------------------------------------------------------------------------------------------------------------------------------------------------------------------------------------------------------------------------------------------------------------------------------------------------------------------------------------------------------------------|-----|-------|----|
| <div>Using Other's Tutorial</div> <div></div> <div><div><div>Your Drawing</div></div><div><div>Jane's Tutorial</div><div>Done</div></div></div> |     |       |    |
